# Supplementary material
Source: PubMed Central journal article supplement (PMC5423859)
Supplement: NIHMS830373-supplement-2.pdf [file NIHMS830373-supplement-2.pdf]

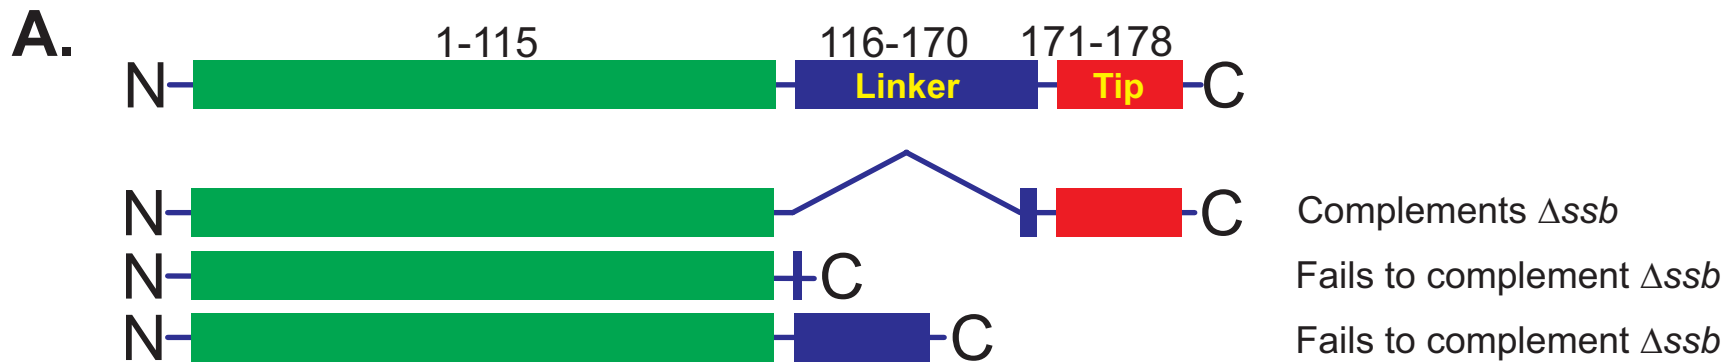

**B.**

|                      |                                                                                   |                                                                                    |                                                                                     |                      |
|----------------------|-----------------------------------------------------------------------------------|------------------------------------------------------------------------------------|-------------------------------------------------------------------------------------|----------------------|
|                      |  |  |  | <u>ssDNA binding</u> |
| SSB $\Delta$ 151-166 | MLGGRQGGGAPAGGNIGGGQPQGGWGQPQQPQGGNQFSGG                                          | -----                                                                              | PPMDFDDDIPF                                                                         | Cooperative          |
| SSB $\Delta$ 130-166 | MLGGRQGGGAPAGGNIGGG                                                               | -----                                                                              | PPMDFDDDIPF                                                                         | Cooperative          |
| SSB $\Delta$ 120-166 | MLGGRQGGG                                                                         | -----                                                                              | PPMDFDDDIPF                                                                         | Cooperative          |
| SSB $\Delta$ 113-168 | MLGG                                                                              | -----                                                                              | MDFDDDIPF                                                                           | non-cooperative      |

**C.**

|       |                                                                                   |                                                                                    |                                                                                     |                        |
|-------|-----------------------------------------------------------------------------------|------------------------------------------------------------------------------------|-------------------------------------------------------------------------------------|------------------------|
|       |  |  |  | <u>Partner binding</u> |
| EcSSB | MLGGRQGGGAPAGGNIGGGQPQGGWGQPQQPQGGNQFSGGAQSRPQQSAPAAAPSNEPPMDFDDDIPF              | -----                                                                              | PPMDFDDDIPF                                                                         | RecG +; RecO +         |
| Ec155 | MLGGRQGGGAPAGGNIGGGQPQGGWGQPQQPQGG                                                | -----                                                                              | PPMDFDDDIPF                                                                         | RecG -; RecO +         |
| Ec145 | MLGGRQGGGAPAGGNIGGGQPQGG                                                          | -----                                                                              | PPMDFDDDIPF                                                                         | RecG -; RecO +         |
| Ec133 | MLGGRQGGGAPA                                                                      | -----                                                                              | PPMDFDDDIPF                                                                         | RecG -; RecO -         |
| Ec125 | MLGG                                                                              | -----                                                                              | PPMDFDDDIPF                                                                         | RecG -; RecO -         |
