# Supplementary material
Source: PubMed Central journal article supplement (PMC5423859)

**Supplementary Figure 2. The SH3 domain aligns with the OB-fold of SSB.** PDB file 2KXC containing an SH3 domain bound to a PXXP containing ligand was aligned onto *E.coli* SSB, PDB file 1EYG. The alignment was done using TM-align. Only one monomer of the tetramer of SSB is shown for clarity.

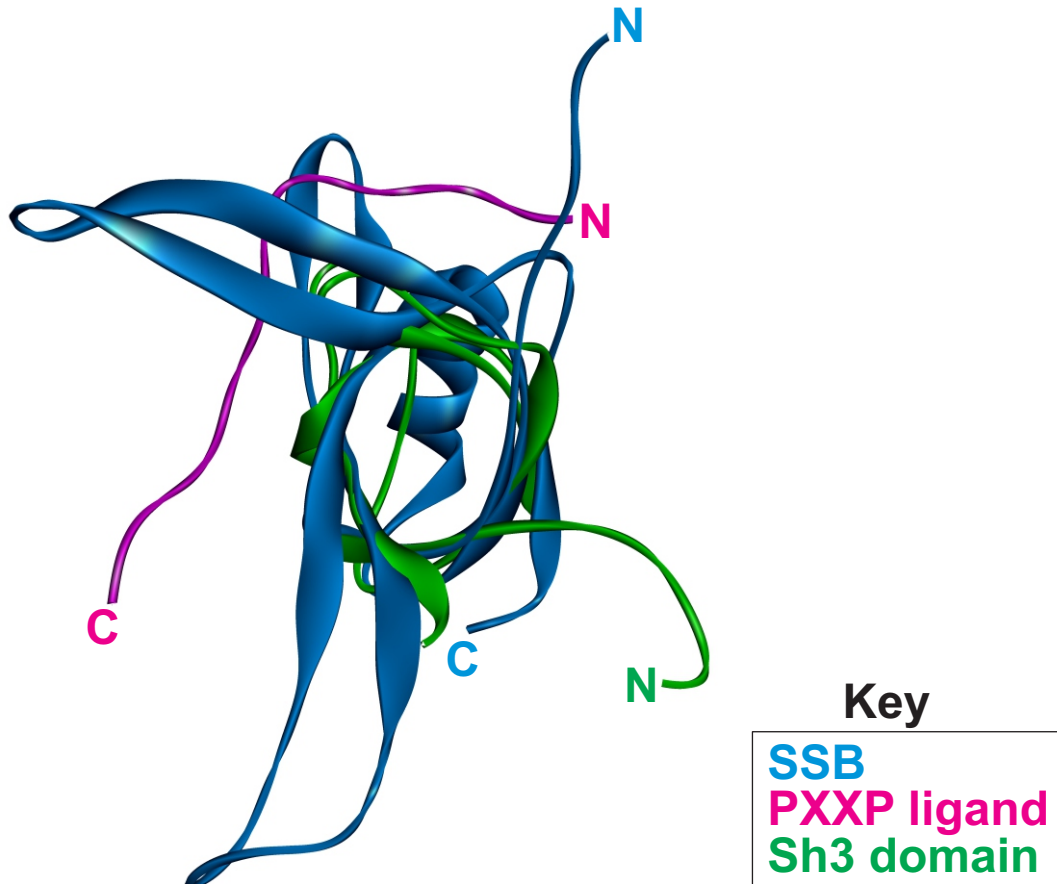

Supplement: NIHMS830373-supplement-4.pdf [file NIHMS830373-supplement-4.pdf]
