# Supplementary material
Source: PubMed Central journal article supplement (PMC5423859)

**A.**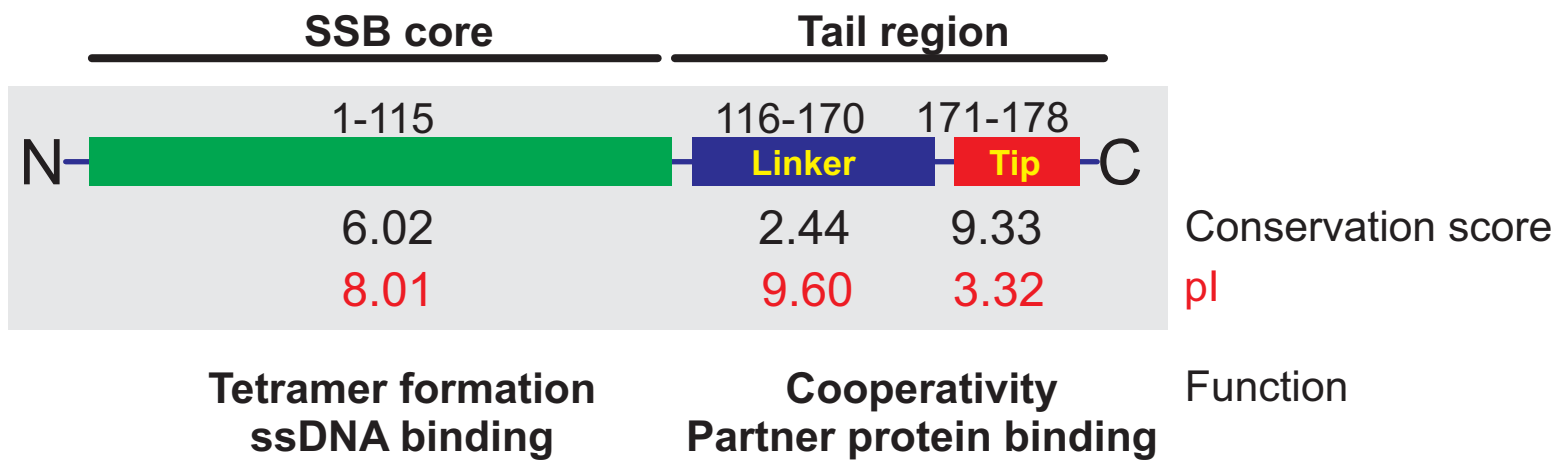**B.**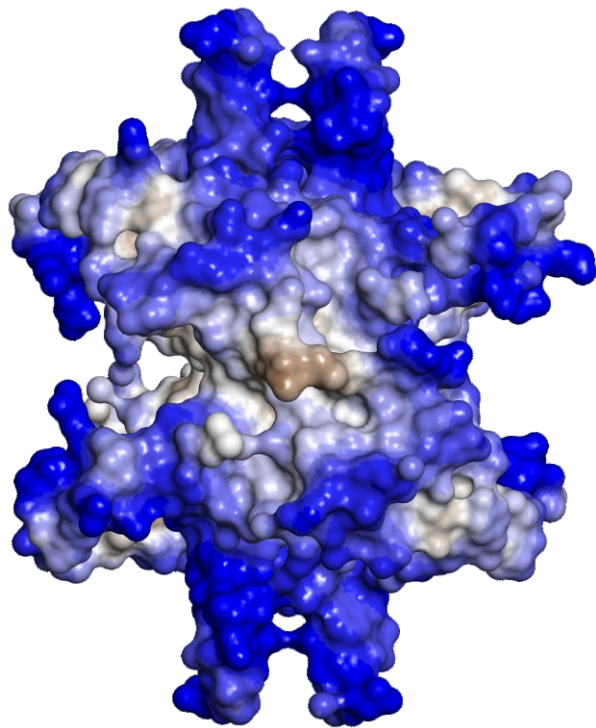**C.**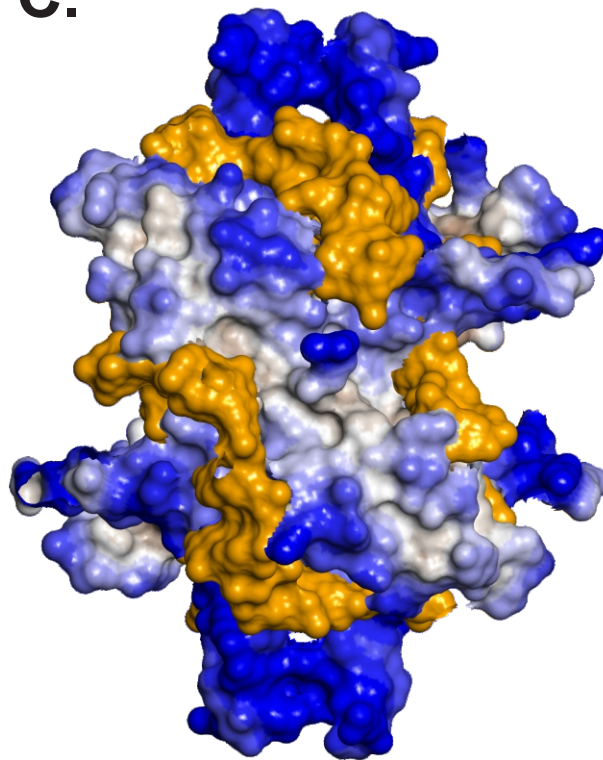**D.**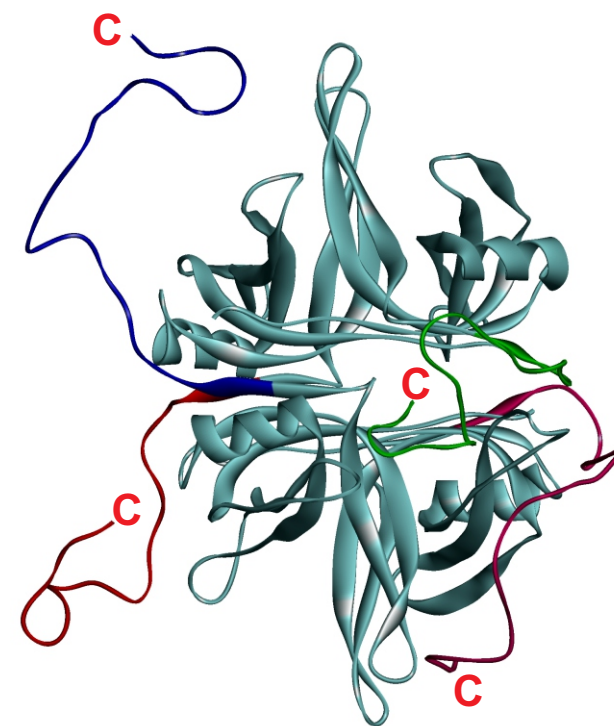

Supplement: NIHMS830373-supplement-1.pdf [file NIHMS830373-supplement-1.pdf]
